# Supplementary material
Source: Springer Nature journal article supplement (https://www.springermedizin.de/resource/supplementary/12985_2006_205_MOESM10_ESM.pdf/9607488)

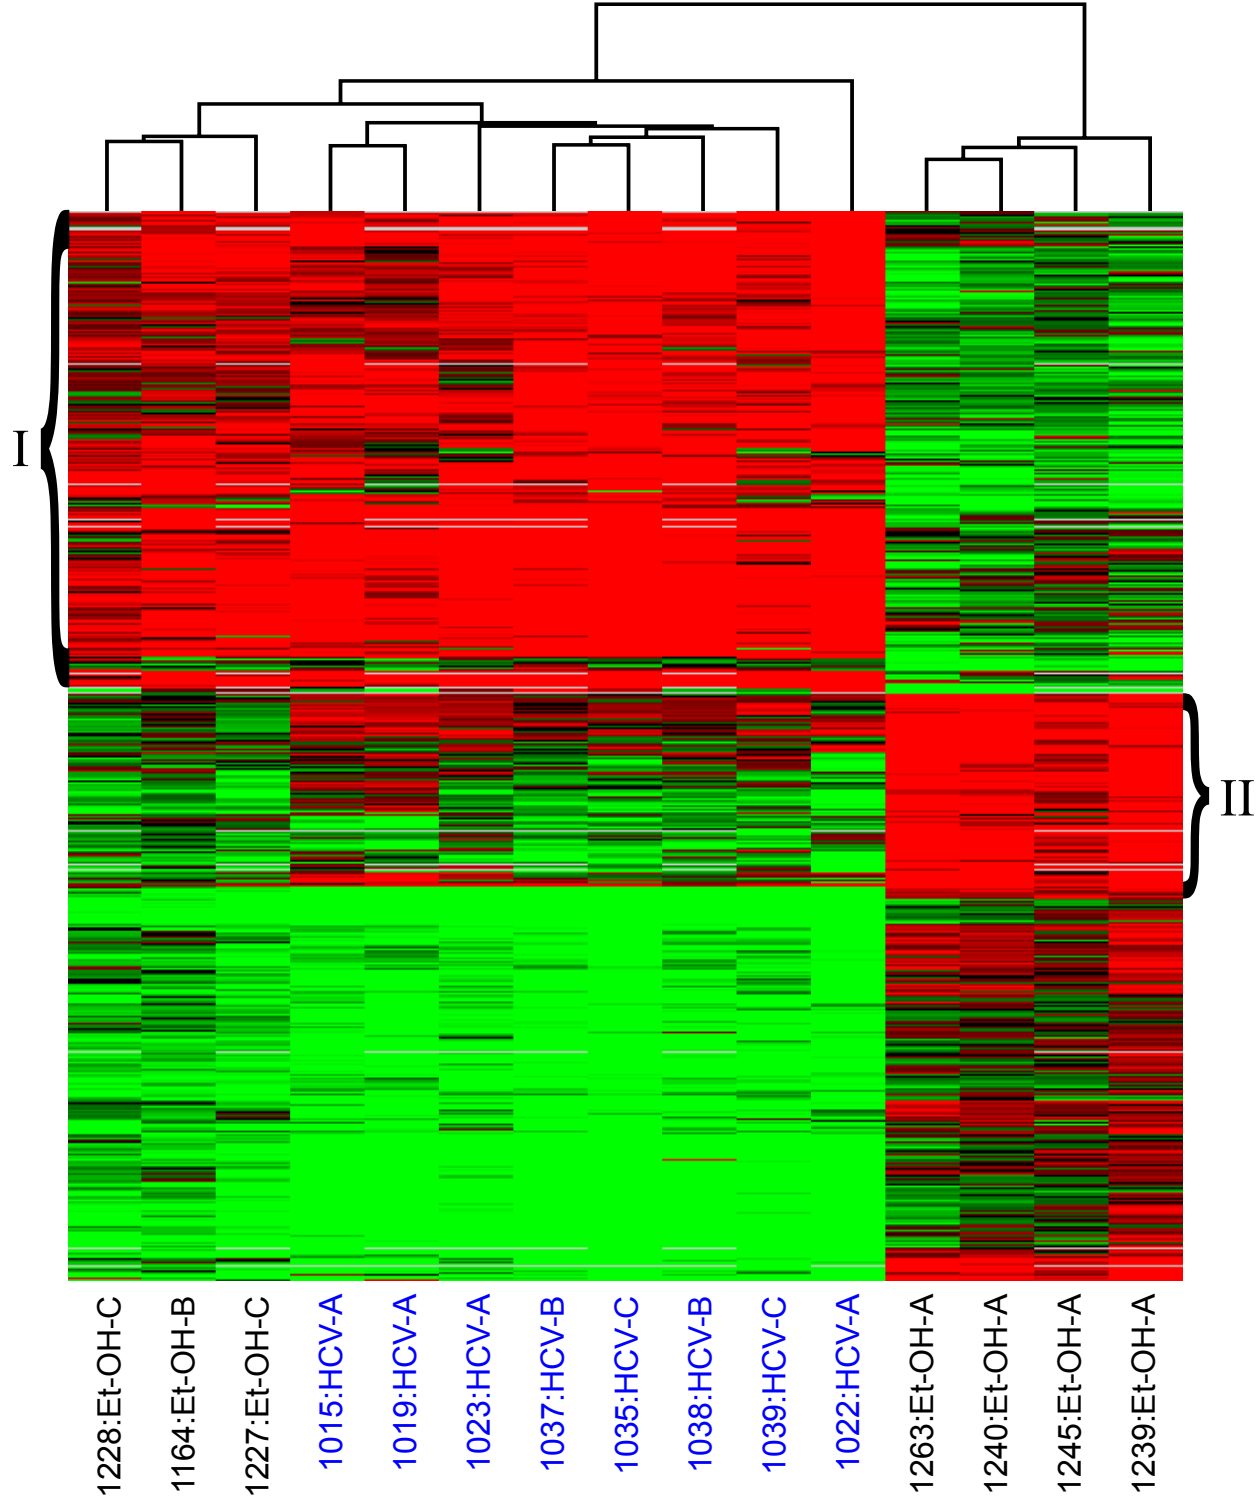

Supplement: MOESM10 [file 9607488]
